# Supplementary material
Source: publisher site journal article supplement (http://www.kjim.org/upload/media/kjim-2019-204-suppl3.pdf)
Supplement: Supplementary file 1 [file kjim-2019-204-suppl3.pdf]

**Supplementary Table 3. SIFT/PolyPhen predictions for rs1150781 and rs114591848**

| SNP ID      | Chr:Pos       | Allele | Consequence      | Gene                   | Transcript ID   | Codons (aminoacid)         | SIFT consequence (score) | PolyPhen consequence (score) |
|-------------|---------------|--------|------------------|------------------------|-----------------|----------------------------|--------------------------|------------------------------|
| rs1150781   | 6:34,214,322  | G      | Missense variant | <i>C6orf1 (SMIM29)</i> | ENSG00000186577 | GGG(Gly150)→ GCG(Ala150)   | Deleterious (0)          | Benign (0.015)               |
| rs114591848 | 14:21,550,212 | G      | Missense variant | <i>ARHGEF40</i>        | ENSG00000165801 | CGG(Arg1062)→ CAG(Gln1062) | Tolerated9 (0.08)        | possibly damaging (0.679)    |

All SNPs were annotated and imported from dbSNP (release 151) in European Molecular Biology Laboratory-European Bioinformatics Institute. SIFT, sorting intolerant from tolerant; PolyPhen, polymorphism phenotyping; SNP, single nucleotide polymorphism; Chr, chromosome; Pos, position; SMIM29, small integral membrane protein 29; ARHGEF40, advanced glycosylation end-product specific receptor.
